# Supplementary material
Source: PubMed Central journal article supplement (PMC4790513)
Supplement: smis005258.ww1_default.pdf [file smis005258.ww1_default.pdf]

## APPENDICES

### Appendix 1. MEDLINE search strategies 2007, 2009, 2011

Ovid MEDLINE(R) In-Process & Other Non-Indexed Citations and Ovid MEDLINE(R) <1948 to 2011>

- 1 Comorbidity/ (48809)
- 2 (comorbid\$ or co-morbid\$).ti,ab. (52767)
- 3 (multimorbid\$ or multi-morbid\$).ti,ab. (712)
- 4 (multidisease? or multi-disease? or (multiple adj (ill\$ or disease? or condition? or syndrom\$ or disorder?)).ti,ab. (1619)
- 5 or/1-4 (88625)
- 6 Chronic disease/ (196972)
- 7 (chronic\$ adj3 (disease? or ill\$ or care or condition? or disorder\$ or health\$ or medication\$ or syndrom\$ or symptom\$)).ti,ab.(172333)
- 8 or/6-7 (329439)
- 9 5 or 8 (408710)
- 10 exp diabetes mellitus/ or diabet\$.ti,ab. (368459)
- 11 exp hypertension/ or (hypertens\$ or "high blood pressure?").ti,ab. (316662)
- 12 exp heart diseases/ or (((heart or cardiac or cardiovascular or coronary) adj (disease? or disorder? or failure)) or arrhythmia?).ti,ab.(882594)
- 13 exp cerebrovascular disorders/ or ((cerebrovascular or vascular or carotoid\$ or arter\$) adj (disorder? or disease?)).ti,ab. (315505)
- 14 exp asthma/ or asthma\$.ti,ab. (118910)
- 15 exp pulmonary disease chronic obstructive/ or (copd or (pulmonary adj2 (disease? or disorder?)).ti,ab. (45836)
- 16 exp hyperlipidemia/ or (hyperlipidem\$ or Hypercholesterolemia\$ or hypertriglyceridemia\$).ti,ab. (65312)
- 17 exp Thyroid diseases/ or ((thyroid adj (disease? or disorder)) or hyperthyroid\$ or hypothyroid\$).ti,ab. (115901)
- 18 exp arthritis rheumatoid/ or rheumatoid arthritis.ti,ab. (103792)
- 19 exp mental disorders/ or (((mental or anxiety or mood or psychological or sleep) adj (disease? or disorder?)) or ((substance or drug or marijuana or cocaine or Amphetamine) adj2 abuse) or depression or schizophren\$ or psychos\$ or "substance abuse" or addiction?).ti,ab. (971649)
- 20 exp epilepsy/ or (epileps\$ or seizure?).ti,ab. (142567)
- 21 exp hiv infections/ or (HIV or acquired immune\$ deficiency syndrome? or (aids adj (associated or related or arteritis))).ti,ab.(255123)
- 22 exp neoplasms/ or (neoplasm? or cancer?).ti,ab. (2345120)
- 23 exp kidney diseases/ or (kidney adj (disease? or disorder?)).ti,ab. (363164)
- 24 exp liver diseases/ or (liver adj (disease? or disorder?)).ti,ab. (387359)
- 25 exp osteoporosis/ or osteoporosis.ti,ab. (50531)
- 26 or/10-25 (5831119)
- 27 ((coocur\$ or co-ocur\$ or coexist\$ or co-exist\$ or multipl\$) adj3 (disease? or ill\$ or care or condition? or disorder\$ or health\$ or medication\$ or symptom\$ or syndrom\$)).ti,ab. (35702)
- 28 chronic\$.ti,ab,hw. (816669)
- 29 27 or 28 (847460)
- 30 26 and 29 (490847)
- 31 exp \*education, continuing/ (27307)
- 32 (education\$ adj2 (program\$ or intervention? or meeting? or session? or strateg\$ or workshop? or visit?)).tw. (34430)
- 33 (behavior\$ adj2 intervention?).tw. (5300)
- 34 \*pamphlets/ (1206)
- 35 (leaflet? or booklet? or poster or posters).tw. (17194)
- 36 ((written or printed or oral) adj information).tw. (1190)
- 37 (information\$ adj2 campaign).tw. (314)
- 38 (education\$ adj1 (method? or material?)).tw. (3637)
- 39 \*advance directives/ (2523)
- 40 outreach.tw. (5976)
- 41 ((opinion or education\$ or influential) adj1 leader?).tw. (705)
- 42 facilitator?.tw. (9507)
- 43 academic detailing.tw. (256)
- 44 consensus conference?.tw. (3391)
- 45 \*guideline adherence/ (6574)
- 46 practice guideline?.tw. (10290)
- 47 (guideline? adj2 (introduc\$ or issu\$ or impact or effect? or disseminat\$ or distribut\$)).tw. (2446)
- 48 ((effect? or impact or evaluat\$ or introduc\$ or compar\$) adj2 training program\$).tw. (440)

49 \*reminder systems/ (915)  
50 reminder?.tw. (5184)  
51 (recall adj2 system\$.tw. (324)  
52 (prompter? or prompting).tw. (3472)  
53 algorithm?.tw. (93991)  
54 \*feedback/ or feedback.tw. (64356)  
55 chart review\$.tw. (16348)  
56 ((effect? or impact or records or chart?) adj2 audit).tw. (630)  
57 compliance.tw. (64556)  
58 marketing.tw. (13755)  
59 or/31-58 (373569)  
60 exp \*reimbursement mechanisms/ (14807)  
61 fee for service.tw. (2797)  
62 \*capitation fee/ (1957)  
63 \*deductibles and coinsurance"/ (514)  
64 cost shar\$.tw. (924)  
65 (copayment? or co payment?).tw. (973)  
66 (prepay\$ or prepaid or prospective payment?).tw. (3894)  
67 \*hospital charges/ (750)  
68 formular?.tw. (2408)  
69 fundhold?.tw. (1)  
70 \*medicaid/ (8711)  
71 \*medicare/ (15463)  
72 blue cross.tw. (992)  
73 or/60-72 (44643)  
74 \*nurse clinicians/ (5175)  
75 \*nurse midwives/ (4229)  
76 \*nurse practitioners/ (9690)  
77 (nurse adj (rehabilitator? or clinician? or practitioner? or midwi\$)).tw. (8545)  
78 \*pharmacists/ (5519)  
79 clinical pharmacist?.tw. (974)  
80 paramedic?.tw. (2649)  
81 \*patient care team/ (17606)  
82 exp \*patient care planning/ (20139)  
83 (team? adj2 (care or treatment or assessment or consultation)).tw. (7516)  
84 (integrat\$ adj2 (care or service?)).tw. (5080)  
85 (care adj2 (coordinat\$ or program\$ or continuity)).tw. (14512)  
86 (case adj1 management).tw. (6240)  
87 exp \*ambulatory care facilities/ (21896)  
88 \*ambulatory care/ (13520)  
89 or/74-88 (125028)  
90 \*home care services/ (17652)  
91 \*hospices/ (2988)  
92 \*nursing homes/ (17447)  
93 \*office visits/ (1775)  
94 \*house calls/ (1130)  
95 \*day care/ (2710)  
96 \*aftercare/ (2459)  
97 \*community health nursing/ (13879)  
98 (chang\$ adj1 location?).tw. (270)  
99 domiciliary.tw. (2007)  
100 (home adj1 treat\$.tw. (1189)  
101 day surgery.tw. (1709)  
102 \*medical records/ (14865)  
103 \*medical records systems, computerized/ (11752)  
104 (information adj2 (management or system?)).tw. (20386)  
105 \*peer review/ (2810)  
106 \*utilization review/ (2436)  
107 exp \*health services misuse/ (2615)  
108 or/90-107 (112686)  
109 \*physician's practice patterns/ (18585)  
110 quality assurance.tw. (15565)  
111 \*process assessment/ [health care] (1134)  
112 \*program evaluation/ (5726)  
113 \*length of stay/ (5765)  
114 (early adj1 discharg\$.tw. (1797)

115 discharge planning.tw. (1848)  
116 offset.tw. (14530)  
117 triage.tw. (6909)  
118 exp \*"Referral and Consultation"/ and "consultation"/ (16242)  
119 \*drug therapy, computer assisted/ (878)  
120 near patient testing.tw. (167)  
121 \*medical history taking/ (3920)  
122 \*telephone/ (3648)  
123 (physician patient adj ((interaction? or relationship?)).tw. (1671)  
124 \*health maintenance organizations/ (9206)  
125 managed care.tw. (15056)  
126 (hospital? adj1 merg\$).tw. (337)  
127 or/109-126 (118024)  
128 ((standard or usual or routine or regular or traditional or conventional or pattern) adj2 care).tw. (25123)  
129 (program\$ adj2 (reduc\$ or increas\$ or decreas\$ or chang\$ or improv\$ or modify\$ or monitor\$ or care)).tw. (30065)  
130 (program\$ adj1 (health or care or intervention?)).tw. (23187)  
131 ((effect? or impact or evaluat\$ or introduc\$ or compar\$) adj2 treatment program\$).tw. (257)  
132 ((effect? or impact or evaluat\$ or introduc\$ or compar\$) adj2 care program\$).tw. (115)  
133 ((effect? or impact or evaluat\$ or introduc\$ or compar\$) adj2 screening program\$).tw. (406)  
134 ((effect? or impact or evaluat\$ or introduc\$ or compar\$) adj2 prevent\$ program\$).tw. (340)  
135 (computer\$ adj2 (dosage or dosing or diagnosis or therapy or decision?)).tw. (3150)  
136 ((introduc\$ or impact or effect? or implement\$ or computer\$) adj2 protocol?).tw. (1953)  
137 ((effect or impact or introduc\$) adj2 (legislation or regulations or policy)).tw. (1177)  
138 or/128-137 (76105)  
139 or/59,73,89,108,127,138 (763155)  
140 randomized controlled trial.pt. (303682)  
141 controlled clinical trial.pt. (82106)  
142 random\$.ti,ab. (541169)  
143 (control\$ adj2 (trial? or study or studies)).ti,ab. (205818)  
144 double-blind method/ or random allocation/ or single-blind method/ (184152)  
145 ((double or single or triple or treble) adj2 blind\$).ti,ab. (107156)  
146 (quasi-experiment\$ or quasiexperiment\$).ti,ab. (3965)  
147 interrupt\$ time series.ti,ab. (571)  
148 or/140-147 (839267)

#### **Search Results MEDLINE 2011**

149 9 and 139 and 148 (4834)  
150 30 and 139 and 148 (3564)  
151 149 or 150 [FINAL RESULTS] (6142)  
152 limit 151 to yr="2009 -Current" (1334)  
153 (2009\* or 2010\* or 2011\*).ed,ep,dp. [Date Limits] (2360220)  
154 (or/149-150) and 153 (1510)  
**155 152 or 154 (1510) [Results 2009 to 2011]**

#### **Search Results MEDLINE 2009**

149 9 and 139 and 148 (1664)  
150 9 and 139 and (intervent\$.ti,ab,pt. or evaluat\$.ti,hw. or impact\$.ti.) (2852)  
151 30 and 139 and 148 (1125)  
152 30 and 139 and (intervent\$.ti,ab,pt. or evaluat\$.ti,hw. or impact\$.ti.) (1822)  
153 149 or 151 (2043) [Results before year limits]  
154 limit 153 to (humans and yr="2008 - 2009") (468)  
155 150 or 152 (3409)  
156 limit 155 to (humans and yr="2008 - 2009") (787)  
**157 remove duplicates from 156 (467) [Set 1: 2008-2009]**  
158 156 or 152 (3409)  
159 limit 158 to (humans and yr="2008 - 2009") (787)  
**160 159 not 157 (564) [Set 2: 2008-2009]**
